# Supplementary material
Source: publisher figshare collection journal article supplement (https://gsajournals.figshare.com/ndownloader/files/27382562)
Supplement: Supplementary file 1 [file 27382562]

***[sid-1(qt9) V; Is(sur-5::gfp) I]***

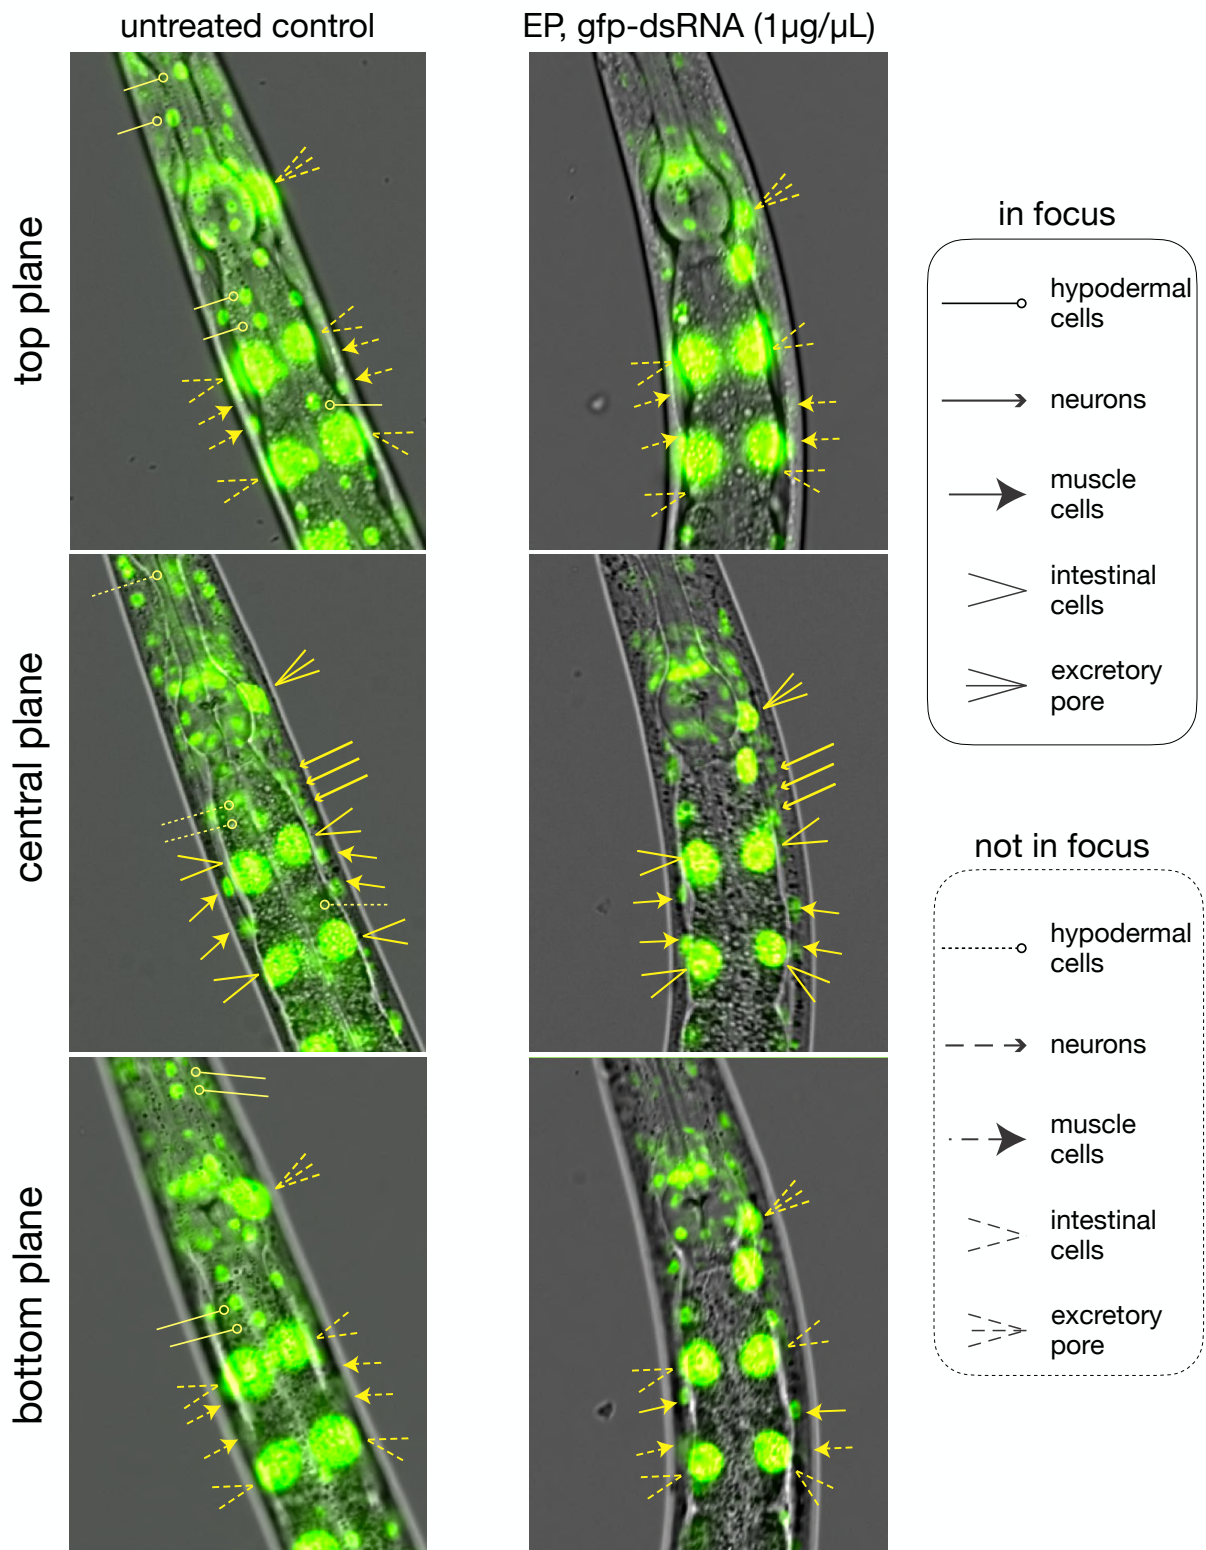

**Figure S3.** Fluorescent Z-stack imaging of BIG0106 worms electroporated with *gfp*-dsRNA.

Imaging of the BIG0106 [*sid-1(qt9) III;ls(sur-5:gfp) I*] worms was performed in 48 hours post electroporation with 1  $\mu\text{g}/\mu\text{L}$  of *gfp*-dsRNA. Imaging in Z-stack mode with three focal planes are presented. Three digital focal planes of electroporated with *gfp*-dsRNA and untreated worms (BIG0106 [*sid-1(qt9) V; ls(sur-5::gfp) I*]) including the top focal plane (side closest to the microscope objective), the central focal plane and the bottom focal plane (side touching the glass slide) are presented. In untreated control worms GFP fluorescence in hypodermal nuclei is in focus and can be clearly seen on the top and bottom planes, whereas intestinal nuclei, muscle nuclei, neurons of the nerve cord and head, excretory pore come in focus in the central focal plane. In contrast, in electroporated worms GFP fluorescence still can be seen in intestinal nuclei, muscle nuclei, neurons of the nerve cord and head, excretory pore come in focus in the central focal plane, however GFP fluorescence from hypodermal nuclei on top and bottom focal planes disappears indicating GFP silencing in this tissue.
